# Supplementary material for: Pharmacokinetics and Pharmacodynamics of Antibody-Drug Conjugates Administered via Subcutaneous and Intratumoral Routes
Source: MDPI journal article supplement (doi:10.3390/pharmaceutics15041132), 2023-04-03
Supplement: s1 [file s1]

# Pharmacokinetics and Pharmacodynamics of Antibody-drug Conjugates Administered via Subcutaneous and Intratumoral Routes

## Supplementary Materials

Hsuan-Ping Chang <sup>1</sup>, Huyen Khanh Le <sup>1</sup> and Dhaval K. Shah <sup>1,\*</sup>

<sup>1</sup> Department of Pharmaceutical Sciences, School of Pharmacy and Pharmaceutical Sciences, The State University of New York at Buffalo, Buffalo, NY

\* Correspondence: dshah4@buffalo.edu

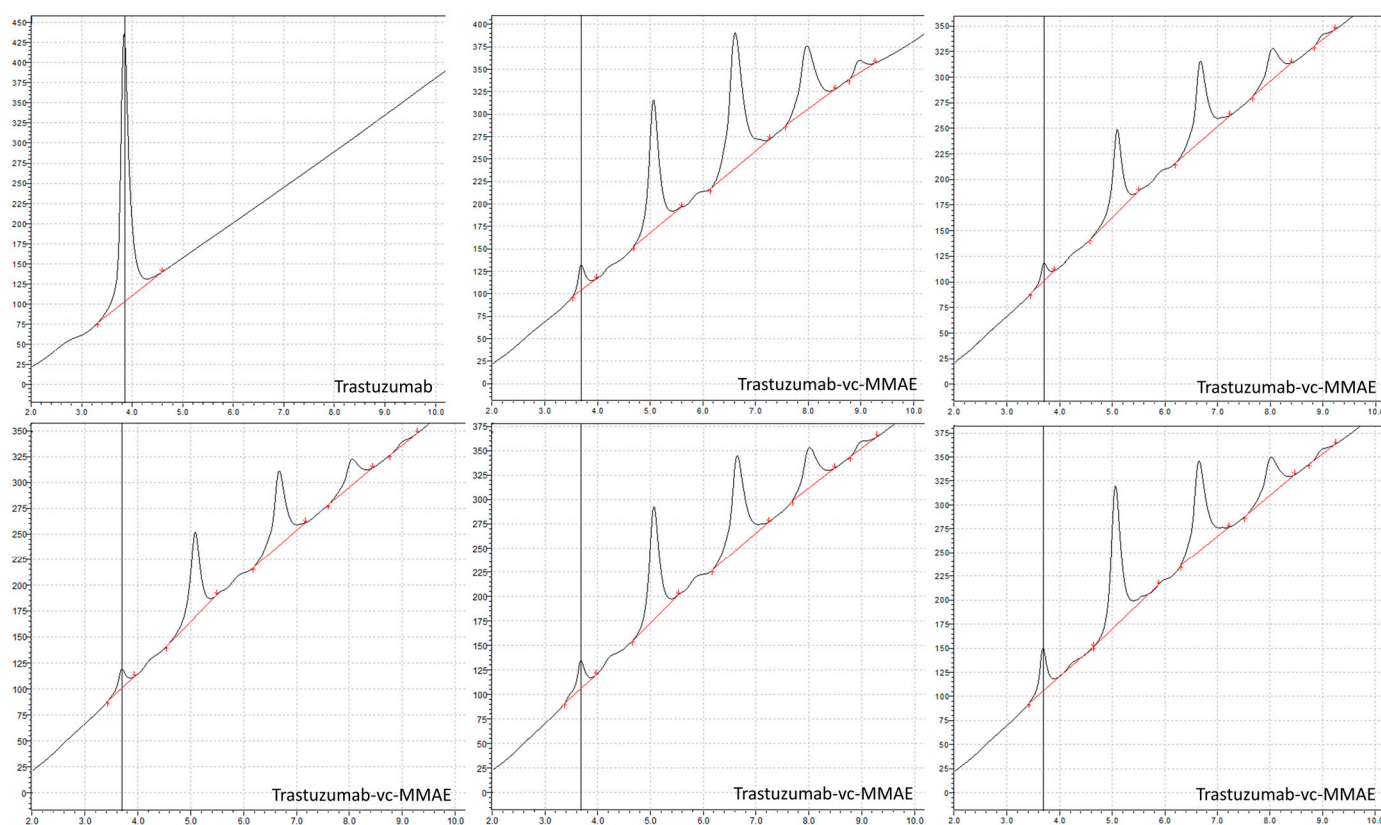

**Figure S1.** Hydrophobic interaction chromatography (HIC) analysis of T-vc-MMAE ADC for different batches used in this study. The average drug-antibody-ratio (DAR) from each batch was comparable. Trastuzumab as a control.

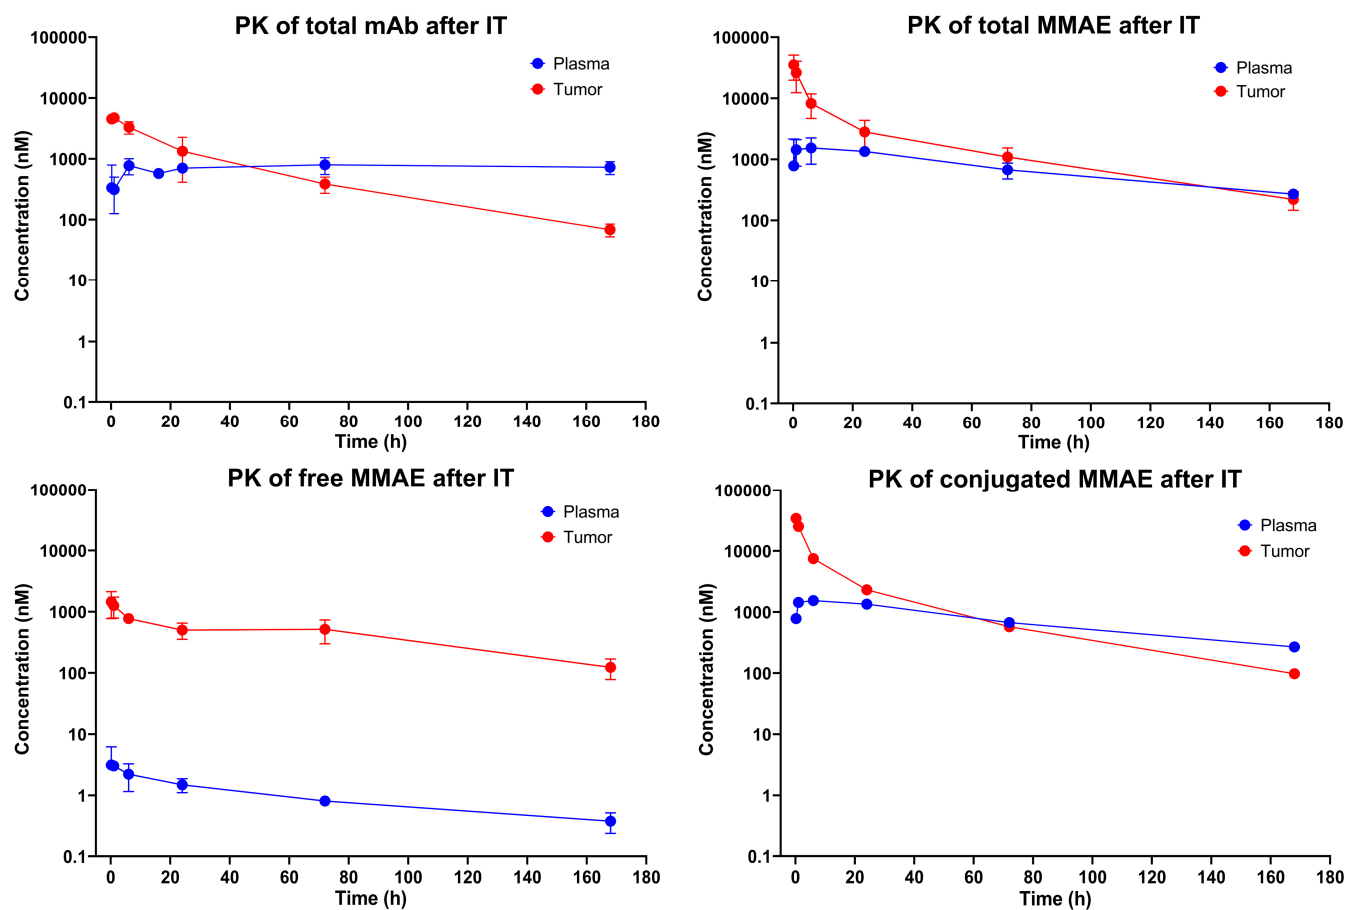

**Figure S2.** Observed plasma and tumor pharmacokinetics (PK) of ADC analytes in mice after intra-tumoral (IT) administration of 10 mg/kg of T-vc-MMAE single dose. The figure displays the mean (SD) observed concentration of: (a) Total antibody; (b) Total MMAE; (c) Unconjugated MMAE; (d) Conjugated MMAE in plasma and tumor.

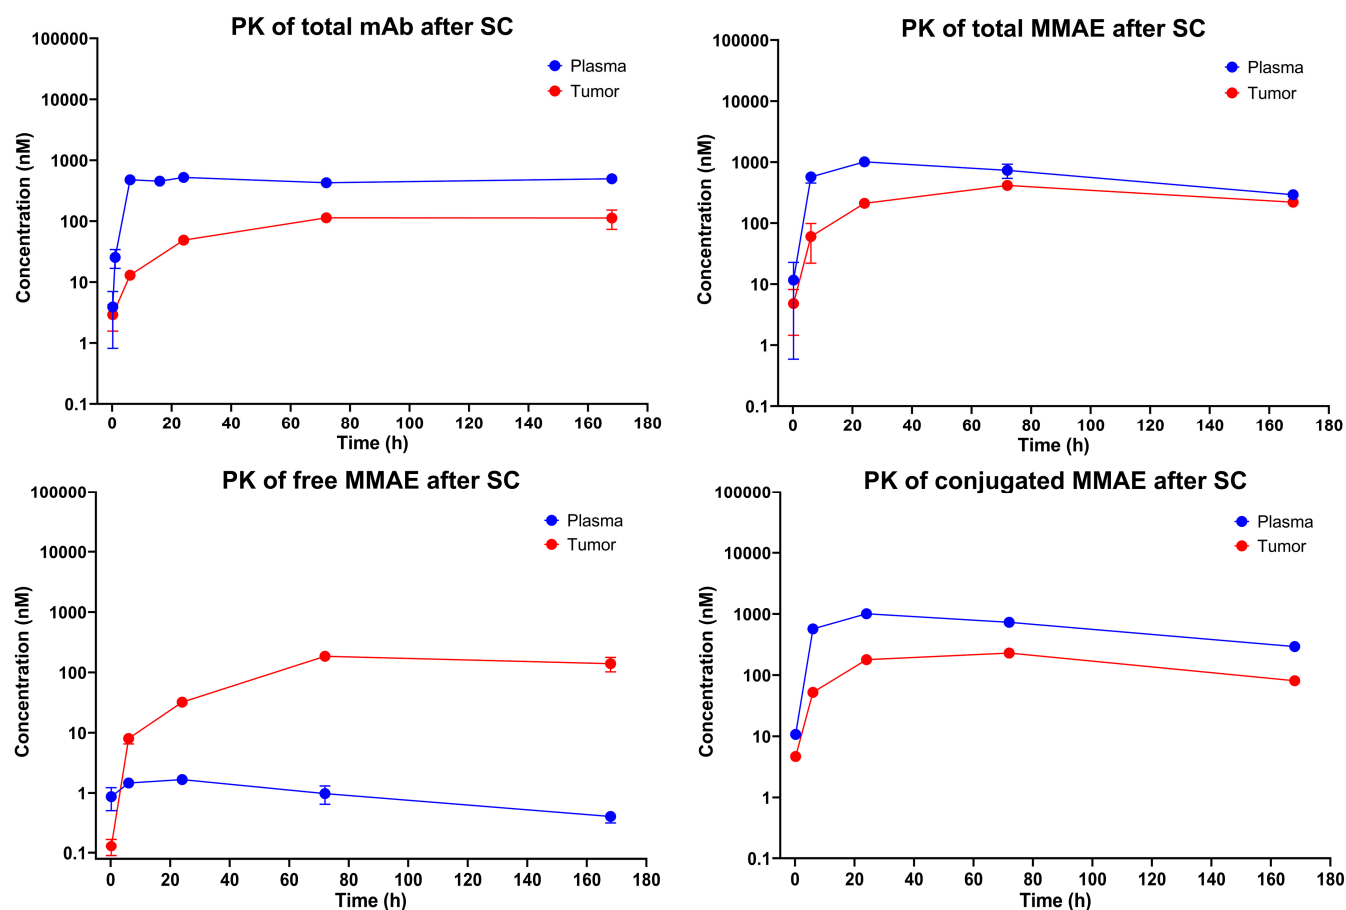

**Figure S3.** Observed plasma and tumor pharmacokinetics (PK) of ADC analytes in mice after subcutaneous (SC) administration of 10 mg/kg of T-vc-MMAE single dose. The figure displays the mean (SD) observed concentration of: (a) Total antibody; (b) Total MMAE; (c) Unconjugated MMAE; (d) Conjugated MMAE in plasma and tumor.

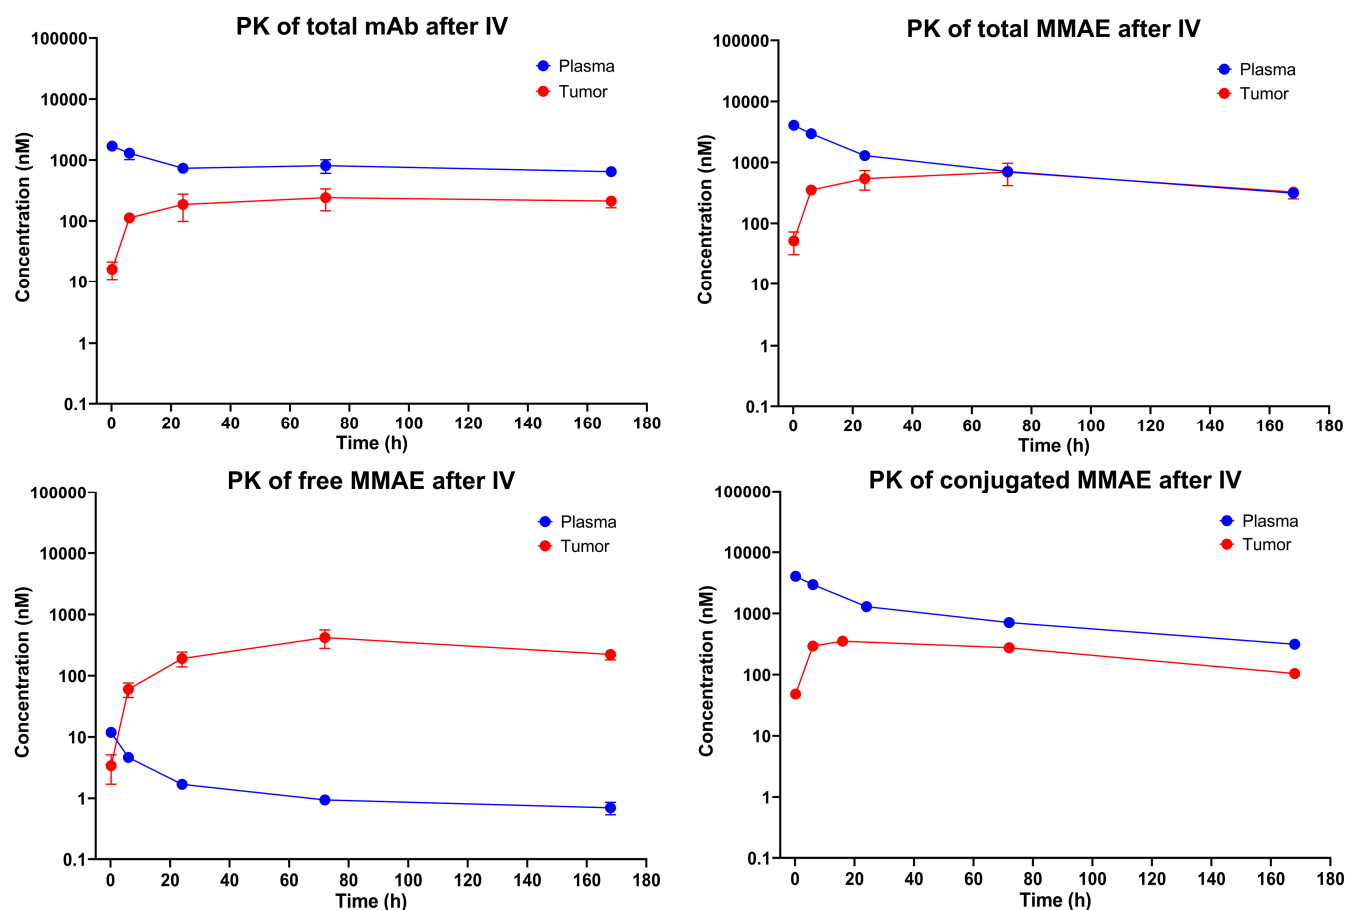

**Figure S4.** Observed plasma and tumor pharmacokinetics (PK) of ADC analytes in mice after intravenous (IV) administration of 10 mg/kg of T-vc-MMAE single dose. The figure displays the mean (SD) observed concentration of: (a) Total antibody; (b) Total MMAE; (c) Unconjugated MMAE; (d) Conjugated MMAE in plasma and tumor.

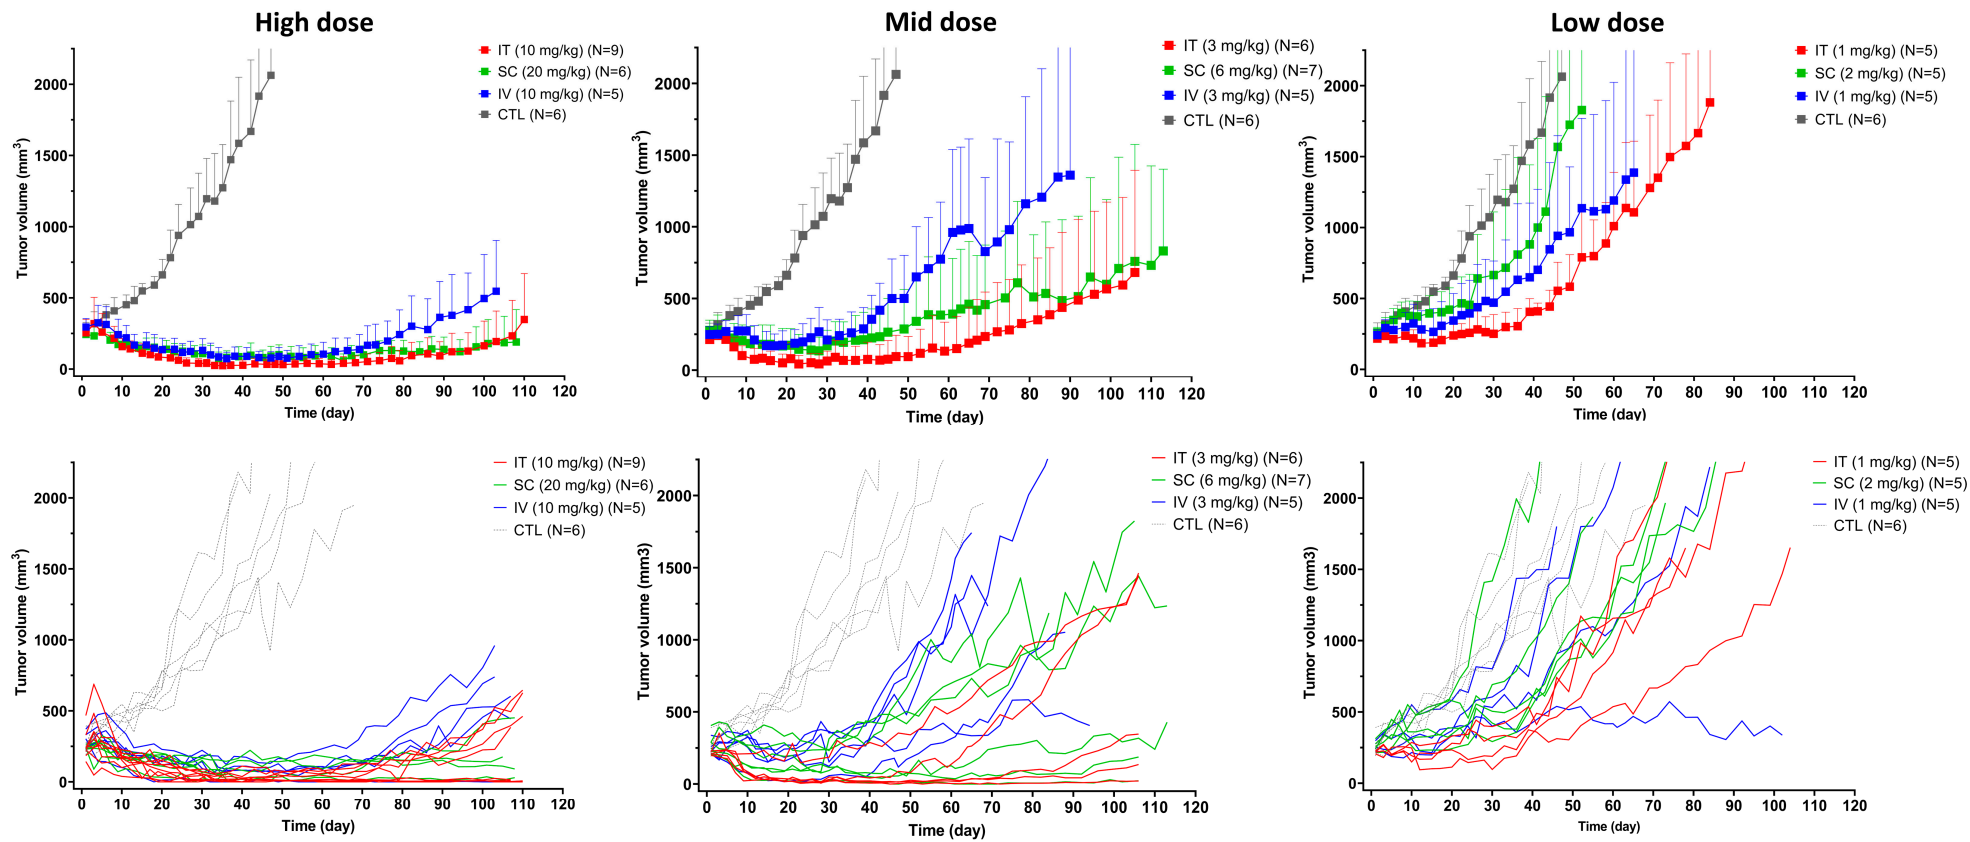

**Figure S5.** *In vivo* efficacy of T-vc-MMAE ADC after intravenous (IV), intratumoral (IT), and subcutaneous (SC) administration of high-, mid-, and low-doses of T-vc-MMAE. The figures show the mean (SD) tumor growth curves (upper) and individual tumor growth curves from each animal (lower) after treatment of high-, mid-, and low-dose of T-vc-MMAE single dose administered via IV, IT, and SC routes, along with the untreated group.

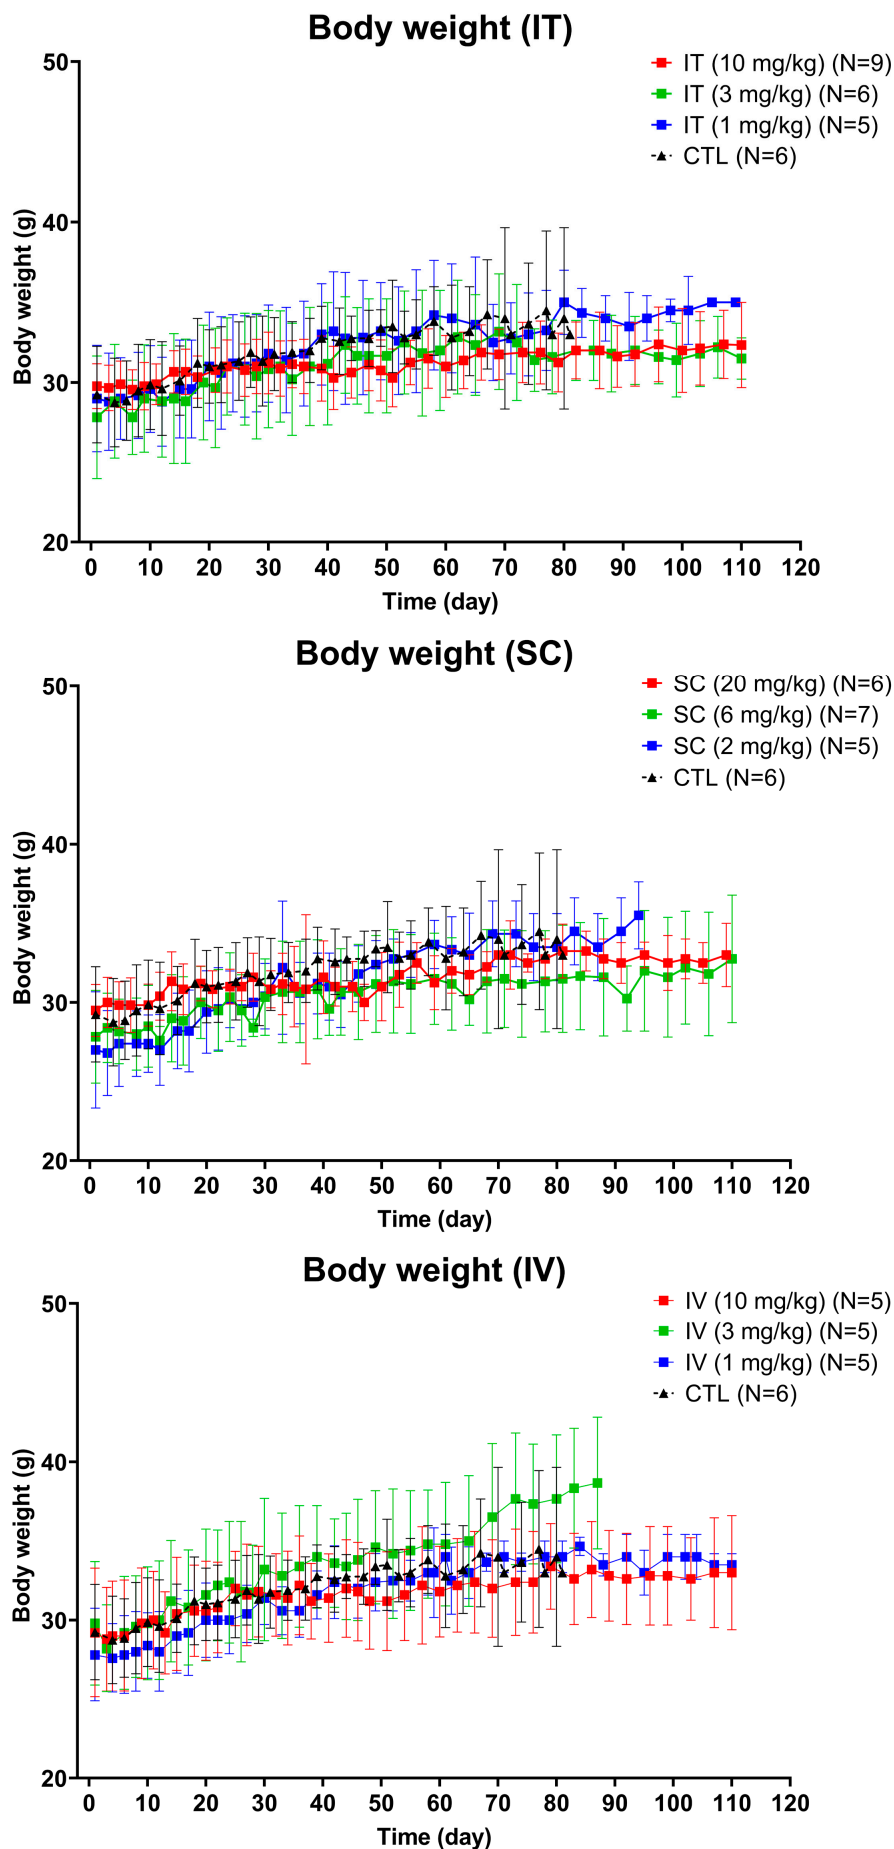

**Figure S6.** Body weight of mice included in the efficacy study. The figures display the mean (SD) body weight curves from mice receiving intratumoral (10, 3, 1 mg/kg), subcutaneous (20, 6, 2 mg/kg), and intravenous (10, 3, 1 mg/kg) administration of T-vc-MMAE single dose, along with the untreated group.



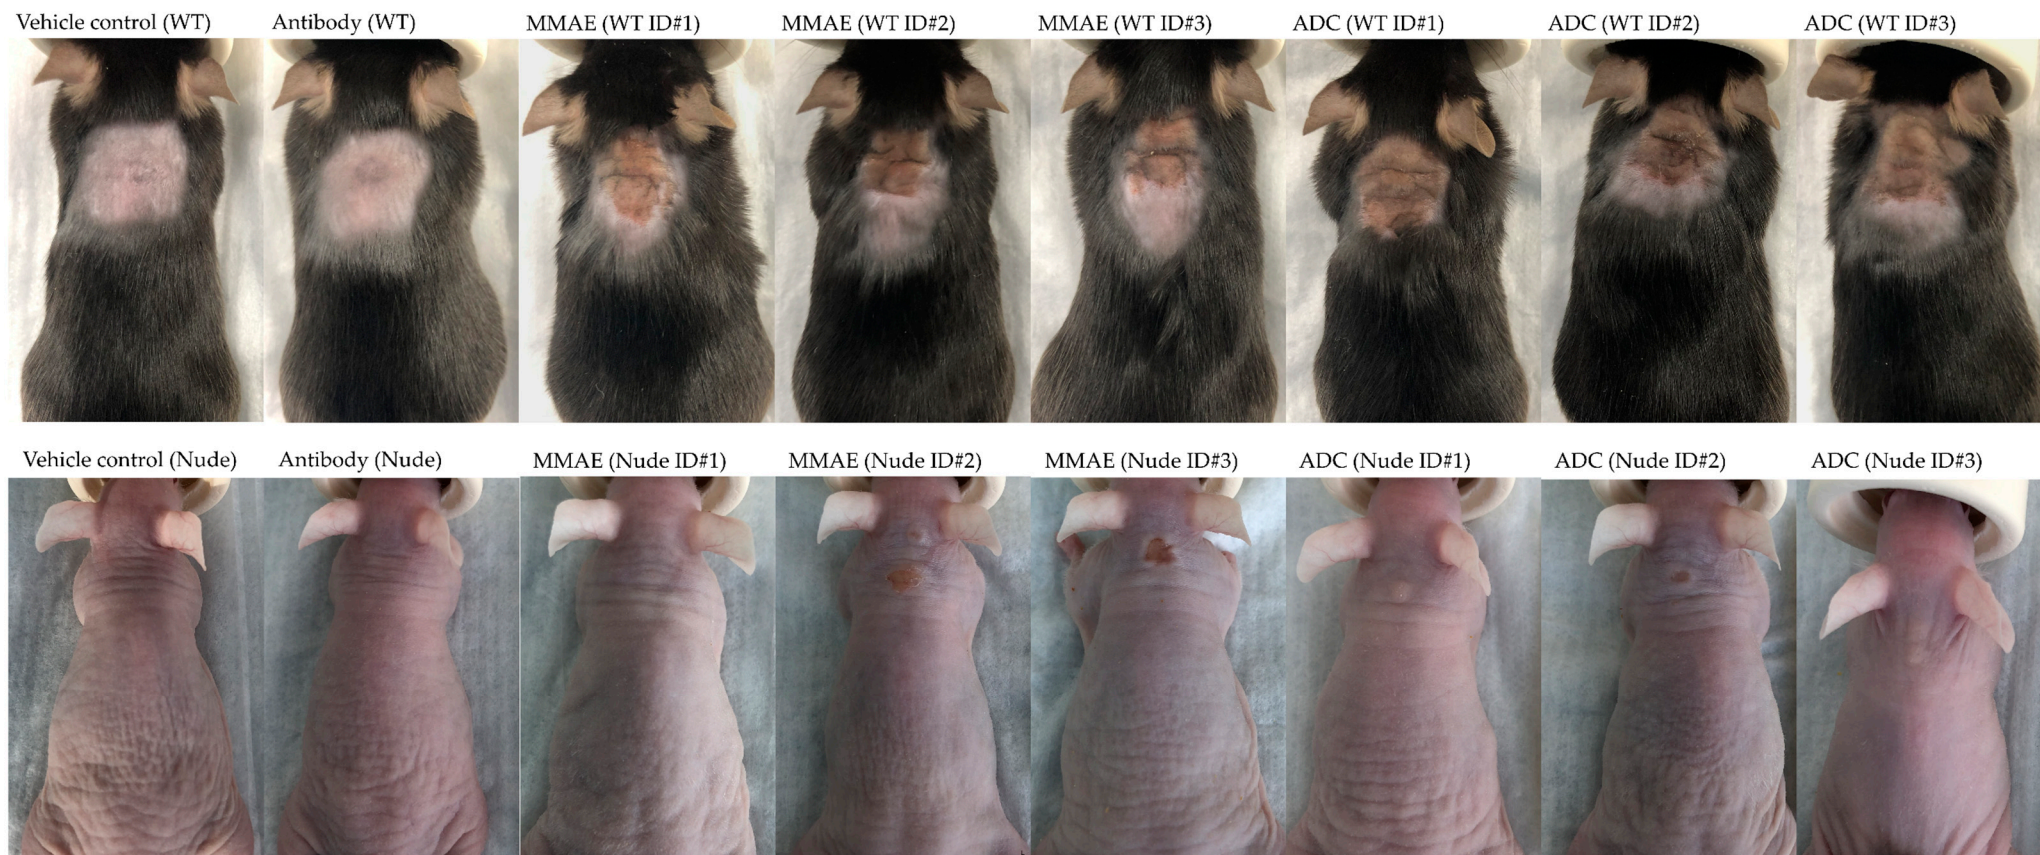

**Figure S7.** Skin observation at the injection site for WT (upper) and nude mice (lower) that received (from left to right): vehicle control subcutaneously, 30 mg/kg of trastuzumab single dose subcutaneously, 0.5 mg/kg of MMAE single dose subcutaneously (N = 3), and 30 mg/kg of T-vc-MMAE ADC single dose subcutaneously (N = 3).

**Table S1.** Summary of animal numbers and initial tumor volume of efficacy study for each administration route and each dosing level.

| Sample size and Initial tumor volume |              |    |                                |                                |
|--------------------------------------|--------------|----|--------------------------------|--------------------------------|
| Route                                | Dose (mg/kg) | N  | Mean volume (mm <sup>3</sup> ) | Mean volume (mm <sup>3</sup> ) |
| IT                                   | 10           | 9  | 255 ± 94                       | 255 ± 88                       |
|                                      | 3            | 6  | 248 ± 84                       |                                |
|                                      | 1            | 5  | 262 ± 99                       |                                |
| SC                                   | 20           | 6  | 246 ± 11                       | 265 ± 45                       |
|                                      | 6            | 7  | 283 ± 66                       |                                |
|                                      | 2            | 5  | 261 ± 36                       |                                |
| IV                                   | 10           | 5  | 296 ± 60                       | 262 ± 54                       |
|                                      | 3            | 5  | 249 ± 54                       |                                |
|                                      | 1            | 5  | 243 ± 38                       |                                |
| CTL                                  | -            | 5  | 244 ± 75                       | 246 ± 63                       |
| Total                                | -            | 58 | 258 ± 65                       | -                              |
